# Supplementary material for: Electrochemical growth of dendritic silver nanostructures as facile SERS substrates
Source: Royal Society of Chemistry journal article supplement (doi:10.1039/d0ce01258k), 2020-12-08
Supplement: d0ce01258k1.pdf [file d0ce01258k1.pdf]

## Supporting Information

### **Electrochemical growth of dendritic silver nanostructures as facile SERS substrates**

Muhammad Usman Amin<sup>a</sup>, Lingling Zhang<sup>a</sup>, Rui Hao<sup>a</sup>, Dongjie Zhang<sup>a</sup>, Hongjun You<sup>b</sup>, Jixiang Fang<sup>a\*</sup>

*a: School of Electronics and Information Engineering, Xi'an Jiaotong University, No.28, Xianning West Road, 710049, Xi'an, Shannxi, China*

*\*jxfang@mail.xjtu.edu.cn*

*b: School of Science, Xi'an Jiaotong University, No.28, Xianning West Road, 710049, Xi'an, Shannxi, China.*

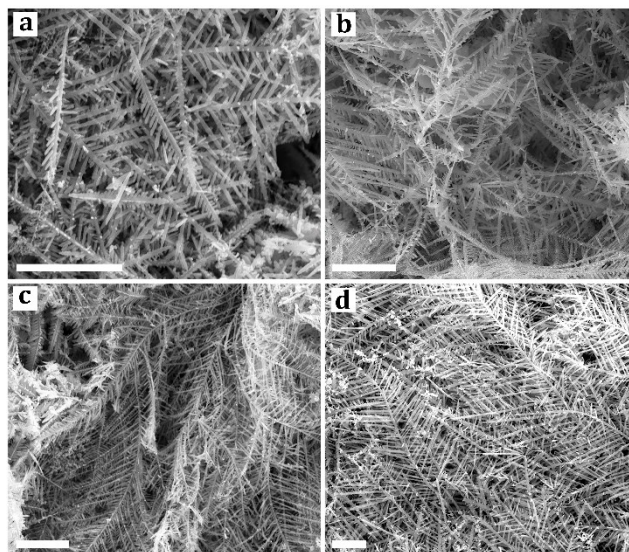

**Fig.S1.** SEM images of dendritic silver nanostructures at high concentration of  $\text{AgNO}_3$  (10 mM) for different growth time a = 30 sec, b = 1min, c = 3 min, d = 5min. Scale bar is 2  $\mu\text{m}$ .

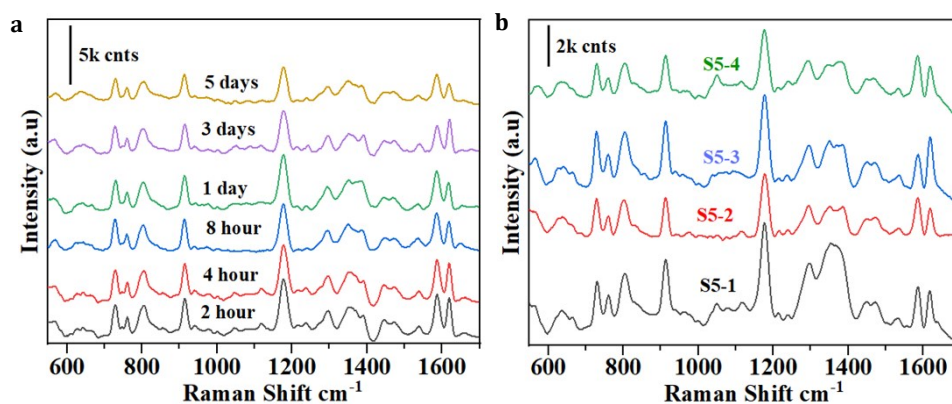

**Fig.S2.** (a) SERS spectra ( $\text{CV-10}^{-8}$  M) to check the stability of the S5 Ag dendritic sample substrate. (b) Repeatability for different S5 samples ( $\text{CV-10}^{-8}$  M).
